# Supplementary material for: Relationship of Thermal Treatment and Antioxidant Capacity in Cooked Foods
Source: MDPI journal article supplement (doi:10.3390/antiox11122324), 2022-11-24
Supplement: s1 [file s1]

**Relationship of thermal treatment and  
antioxidant capacity in cooked foods**

**SUPPLEMENTAL INFORMATION**

**Table S1.** Samples: foods and applied thermal processing.

| Food Group | Food           | Cooking Method |
|------------|----------------|----------------|
| Cereals    | Bread          | Fried          |
| Cereals    | Bread          | Toasted        |
| Cereals    | Penne          | Boiled         |
| Cereals    | Rice           | Boiled         |
| Egg        | Egg            | Boiled         |
| Egg        | Egg            | Grilled        |
| Egg        | Egg            | Fried          |
| Egg        | Egg            | Roasted        |
| Fish       | Cod fish       | Boiled         |
| Fish       | Cod fish       | Grilled        |
| Fish       | Cod fish       | Fried          |
| Fish       | Salmon         | Grilled        |
| Fish       | Salmon         | Fried          |
| Fish       | Salmon         | Roasted        |
| Fruits     | Apple          | Grilled        |
| Fruits     | Apple          | Fried          |
| Fruits     | Apple          | Roasted        |
| Fruits     | Banana         | Grilled        |
| Fruits     | Banana         | Roasted        |
| Legumes    | Beans (Kidney) | Boiled         |
| Legumes    | Beans (Kidney) | Roasted        |
| Legumes    | Lentils        | Boiled         |
| Legumes    | Lentils        | Grilled        |
| Legumes    | Lentils        | Roasted        |
| Meat       | Beef           | Boiled         |
| Meat       | Beef           | Grilled        |
| Meat       | Beef           | Fried          |
| Meat       | Beef           | Roasted        |
| Meat       | Chicken        | Boiled         |
| Meat       | Chicken        | Grilled        |
| Meat       | Chicken        | Fried          |
| Meat       | Chicken        | Roasted        |
| Meat       | Lamb           | Boiled         |
| Meat       | Lamb           | Grilled        |
| Meat       | Lamb           | Fried          |
| Meat       | Lamb           | Roasted        |
| Meat       | Pork           | Boiled         |
| Meat       | Pork           | Grilled        |
| Meat       | Pork           | Fried          |
| Meat       | Pork           | Roasted        |
| Tubers     | Potatoe        | Boiled         |
| Tubers     | Potatoe        | Grilled        |
| Tubers     | Potatoe        | Fried          |
| Vegetables | Capsicum       | Boiled         |
| Vegetables | Capsicum       | Grilled        |
| Vegetables | Capsicum       | Fried          |
| Vegetables | Capsicum       | Roasted        |
| Vegetables | Carrot         | Boiled         |

| Food Group | Food        | Cooking Method |
|------------|-------------|----------------|
| Vegetables | Carrot      | Grilled        |
| Vegetables | Carrot      | Fried          |
| Vegetables | Carrot      | Roasted        |
| Vegetables | Cauliflower | Boiled         |
| Vegetables | Cauliflower | Grilled        |
| Vegetables | Cauliflower | Fried          |
| Vegetables | Cauliflower | Roasted        |
| Vegetables | Onion       | Boiled         |
| Vegetables | Onion       | Grilled        |
| Vegetables | Onion       | Fried          |
| Vegetables | Onion       | Roasted        |
| Vegetables | Tomatoe     | Boiled         |
| Vegetables | Tomatoe     | Fried          |
| Vegetables | Tomatoe     | Roasted        |

**Table S2.** Correlations between heat damage markers (furosine, HMF and furfural), and the results of antioxidant capacity measured with Folin-Ciocalteu, FRAP and DPPH after digestion and in vitro fermentation processes, depending on the different foods groups

| CEREALS                     | M     | SD    | FUROSINE              | HMF                 | FURFURAL            |
|-----------------------------|-------|-------|-----------------------|---------------------|---------------------|
| Folin-Ciocalteu Digestion   | 1935  | 1405  | .41<br>[-.29, .83]    | .07<br>[-.59, .67]  | .09<br>[-.57, .68]  |
| Folin-Ciocalteu Fermentatio | 18638 | 5744  | -.49<br>[-.85, .21]   | .49<br>[-.20, .86]  | .42<br>[-.29, .83]  |
| FRAP Digestion              | 4.12  | 4.29  | .34<br>[-.37, .80]    | -.25<br>[-.76, .45] | -.28<br>[-.77, .43] |
| FRAP Fermentation           | 105   | 17.8  | -.11<br>[-.69, .56]   | .52<br>[-.16, .87]  | .37<br>[-.34, .81]  |
| DPPH Digestion              | 4.98  | 5.16  | -.64*<br>[-.91, -.02] | -.16<br>[-.72, .52] | -.04<br>[-.65, .60] |
| DPPH Fermentation           | 104   | 23.4  | .12<br>[-.55, .70]    | -.25<br>[-.76, .45] | -.27<br>[-.77, .43] |
| EGGS                        | M     | SD    | FUROSINE              | HMF                 | FURFURAL            |
| Folin-Ciocalteu Digestion   | 2542  | 1664  | .65<br>[-.83, .99]    | -.66<br>[-.99, .82] | .83<br>[-.65, 1.00] |
| Folin-Ciocalteu Fermentatio | 49849 | 4956  | .66<br>[-.82, .99]    | -.51<br>[-.99, .88] | .36<br>[-.92, .98]  |
| FRAP Digestion              | 5.90  | 0.83  | .41<br>[-.91, .98]    | -.63<br>[-.99, .84] | .47<br>[-.90, .99]  |
| FRAP Fermentation           | 282   | 12.0  | .14<br>[-.95, .97]    | .13<br>[-.95, .97]  | -.34<br>[-.98, .92] |
| DPPH Digestion              | 9.99  | 0.81  | -.04<br>[-.96, .96]   | .02<br>[-.96, .96]  | .77<br>[-.74, .99]  |
| DPPH Fermentation           | 235   | 70.6  | .36<br>[-.92, .98]    | -.41<br>[-.98, .91] | .93<br>[-.31, 1.00] |
| FISH                        | M     | SD    | FUROSINE              | HMF                 | FURFURAL            |
| Folin-Ciocalteu Digestion   | 2626  | 825   | -.02<br>[-.82, .80]   | .32<br>[-.67, .90]  | -.53<br>[-.94, .49] |
| Folin-Ciocalteu Fermentatio | 59530 | 22284 | -.09<br>[-.84, .78]   | .13<br>[-.76, .85]  | -.36<br>[-.91, .64] |
| FRAP Digestion              | 2.51  | 0.64  | .43<br>[-.59, .92]    | .44<br>[-.58, .92]  | .12<br>[-.77, .85]  |
| FRAP Fermentation           | 319   | 130   | -.09<br>[-.84, .78]   | .13<br>[-.76, .85]  | -.37<br>[-.91, .63] |
| DPPH Digestion              | 14.2  | 8.95  | .21<br>[-.73, .87]    | .22<br>[-.72, .88]  | .07<br>[-.79, .83]  |
| DPPH Fermentation           | 214   | 36.7  | -.26<br>[-.88, .70]   | -.32<br>[-.90, .67] | -.12<br>[-.85, .76] |
| FRUITS                      | M     | SD    | FUROSINE              | HMF                 | FURFURAL            |
| Folin-Ciocalteu Digestion   | 598   | 512   | -.57<br>[-.99, .87]   | -.64<br>[-.99, .84] | -.28<br>[-.98, .93] |
| Folin-Ciocalteu Fermentatio | 31752 | 8985  | .64<br>[-.83, .99]    | .63<br>[-.84, .99]  | .87<br>[-.56, 1.00] |
| FRAP Digestion              | 5.81  | 3.81  | -.55<br>[-.99, .87]   | -.20<br>[-.97, .94] | .24<br>[-.94, .98]  |

| FRUITS                      | M     | SD    | FUROSINE              | HMF                     | FURFURAL              |
|-----------------------------|-------|-------|-----------------------|-------------------------|-----------------------|
| FRAP Fermentation           | 126   | 39.2  | -.09<br>[-.97, .95]   | -.52<br>[-.99, .88]     | -.96*<br>[-1.00, .04] |
| DPPH Digestion              | 22.2  | 33.5  | -.66<br>[-.99, .82]   | -.63<br>[-.99, .84]     | -.43<br>[-.98, .90]   |
| DPPH Fermentation           | 144   | 24.3  | -.00<br>[-.96, .96]   | -.99**<br>[-1.00, -.69] | -.53<br>[-.99, .88]   |
| LEGUMES                     | M     | SD    | FUROSINE              | HMF                     | FURFURAL              |
| Folin-Ciocalteu Digestion   | 1803  | 1532  | .46<br>[-.71, .95]    | .21<br>[-.83, .92]      | -.33<br>[-.94, .78]   |
| Folin-Ciocalteu Fermentatio | 43519 | 19159 | .77<br>[-.36, .98]    | -.23<br>[-.92, .82]     | -.21<br>[-.92, .83]   |
| FRAP Digestion              | 6.95  | 4.52  | -.39<br>[-.95, .75]   | .17<br>[-.84, .91]      | -.89*<br>[-.99, -.05] |
| FRAP Fermentation           | 240   | 101   | .72<br>[-.44, .98]    | -.16<br>[-.91, .84]     | -.33<br>[-.94, .78]   |
| DPPH Digestion              | 38.7  | 5.21  | .06<br>[-.87, .89]    | -.17<br>[-.91, .84]     | -.78<br>[-.98, .34]   |
| DPPH Fermentation           | 187   | 56.3  | -.84<br>[-.99, .16]   | -.01<br>[-.88, .88]     | -.70<br>[-.98, .48]   |
| MEAT                        | M     | SD    | FUROSINE              | HMF                     | FURFURAL              |
| Folin-Ciocalteu Digestion   | 2616  | 998   | .00<br>[-.51, .52]    | -.02<br>[-.53, .50]     | -.10<br>[-.59, .43]   |
| Folin-Ciocalteu Fermentatio | 49297 | 13682 | -.05<br>[-.55, .48]   | -.12<br>[-.60, .42]     | -.12<br>[-.60, .42]   |
| FRAP Digestion              | 3.05  | 0.68  | -.58*<br>[-.84, -.10] | .06<br>[-.47, .56]      | -.00<br>[-.51, .51]   |
| FRAP Fermentation           | 278   | 73.7  | -.17<br>[-.63, .37]   | -.23<br>[-.67, .32]     | -.18<br>[-.64, .36]   |
| DPPH Digestion              | 14.6  | 6.10  | .48<br>[-.04, .80]    | .31<br>[-.24, .71]      | .22<br>[-.33, .66]    |
| DPPH Fermentation           | 481.7 | 288   | -.42<br>[-.77, .12]   | -.38<br>[-.75, .16]     | -.18<br>[-.63, .37]   |
| VEGETABLES                  | M     | SD    | FUROSINE              | HMF                     | FURFURAL              |
| Folin-Ciocalteu Digestion   | 461   | 394   | .80**<br>[.52, .92]   | .80**<br>[.53, .93]     | -.02<br>[-.49, .47]   |
| Folin-Ciocalteu Fermentatio | 27727 | 13643 | -.08<br>[-.54, .42]   | -.15<br>[-.59, .36]     | -.22<br>[-.64, .29]   |
| FRAP Digestion              | 5.20  | 5.70  | .80**<br>[.52, .92]   | .74**<br>[.40, .90]     | -.04<br>[-.51, .45]   |
| FRAP Fermentation           | 149   | 66.0  | -.04<br>[-.51, .45]   | -.08<br>[-.54, .42]     | -.14<br>[-.58, .36]   |
| DPPH Digestion              | 17.4  | 20.3  | .84**<br>[.60, .94]   | .75**<br>[.42, .90]     | -.03<br>[-.50, .46]   |
| DPPH Fermentation           | 136.3 | 51.4  | -.22<br>[-.63, .29]   | -.16<br>[-.60, .34]     | -.08<br>[-.54, .42]   |

Note. SD is used to represent standard deviation.. Values in square brackets indicate the 95% confidence interval for each correlation. The confidence interval is a plausible range of population correlations that could have caused the sample correlation (Cumming, 2014). \* indicates  $p < .05$ . \*\* indicates  $p < .01$ .
